# Supplementary material for: A Developmental Perspective of Global and Local Visual Perception in Autism Spectrum Disorder
Source: Springer Nature journal article supplement (doi:10.1007/s10803-016-2834-1), 2016-07-01
Supplement: MOESM1 [file 10323190]

**Supplementary Material**

**Comparisons of Global and Local Accuracy Within Groups**

Overall accuracy scores in global and local conditions were compared within each group using Wilcoxon signed-rank tests. Global (*Mdn* = 95.83) and local (*Mdn* = 95.83) accuracy scores were similar in the TD group, *z* = - 0.74, *p* = 0.459 , *r* = -0.12, but median accuracy was significantly lower in the global (*Mdn* = 92.71) than local condition (*Mdn* = 95.83) in the ASD group, *z* = - 2.75, *p* = 0.006 , *r* = -0.44, (see Supplementary Figure 1). The results indicate that while the TD group was similarly accurate across conditions, the ASD group was more accurate in the local than global condition.

**Comparisons of Global and Local Accuracy Between Groups**

Mann-Whitney U tests were used to compare accuracy scores between groups. The ASD group (*Mdn* = 92.71) was significantly less accurate than the TD group (*Mdn* = 95.83), *U* = 563.50, *z* = -2.13, *p* = 0.033, *r* = -.24, in the global condition, but performed similarly in the local condition (ASD and TD; *Mdn* = 95.83), *U* = 750.50, *z* = -0.29, *p* = 0.771, *r* = -0.03. This comparison thus suggests that ASD and TD groups performed comparably in the local but not global condition. The ASD group was significantly less accurate than the TD group in the global condition.

**Differences in the Effect of Global-to-Local and Local-to-Global Interference on Accuracy Between Groups**

Supplementary Figures 2a and b show the median global-to-local and local-to-global interference scores in each group.Similar to the results found for RT, the effect of global-to-local interference on accuracy was comparable between TD and ASD groups, *U* = 674.00, *z* = -1.04, *p* = .276, *r* = -.12. The effect of local-to-global interference, however, was significantly higher in the ASD than in the TD group, *U* = 451.00, *z* = -3.23, *p*< .0001, r = -.36. This suggests that participants with ASD had difficulty identifying global stimuli when interfering local stimuli were present.

**Discussion**

Although the effect of age could not be analyzed, performances in terms of accuracy resembled those of RT. The cross-sectional trajectories of global and local accuracy revealed that differences within the ASD group are very pronounced at 6 years of age, but diminished by 16 years of age. Visual examination of these data suggested that the large disparity in accuracy in the youngest participants was largely responsible for the differences across ages. Accuracy was significantly lower in the ASD than in the TD group in the global condition because participants with ASD made many errors for inconsistent stimuli, as reflected by their high local-to-global interference.

These results agree with some studies (Mottron & Belleville, 1993; Plaisted et al., 1999; Scherf et al., 2008; Wang et al., 2007), but differ from others. This is likely because of the type of analyses conducted. In contrast to many other studies, we performed non-parametric tests to examine within and between-group differences. This was done because our data violated the assumptions of normality. High levels of accuracy are often achieved on hierarchical figures task and therefore, near-ceiling or ceiling effects often skew the distribution of the data. This was the case in the present study, particularly for the TD group. While this issue made parametric analyses unsuitable, the non-parametric analyses may have facilitated the identification of group differences, similar to other studies (Wang et al., 2007).

| Supplementary Table 1a  *Pearson Bivariate Correlations Between IQ Scores and Mean Reaction Time for ASD and TD Groups* | | | | | |
| --- | --- | --- | --- | --- | --- |
|  | Group | Global Consistent RT | Global Inconsistent RT | Local Consistent RT | Local Inconsistent RT |
| Full-Scale IQ | ASD | -.284 | -.326 | -.189 | -.174 |
| TD | -.107 | -.123 | -.195 | -.139 |
| Performance IQ | ASD | .129 | .138 | .177 | .156 |
| TD | -.085 | -.074 | -.100 | -.052 |
| Verbal IQ | ASD | .202 | .154 | .265 | .264 |
| TD | -.043 | .013 | -.104 | -.021 |

*Note. *p* <.05*, **p* <.001

| Supplementary Table 1b  *Pearson Bivariate Correlations Between IQ Scores and Mean Accuracy for ASD and TD Groups* | | | | | |
| --- | --- | --- | --- | --- | --- |
|  | Group | Global Consistent Accuracy | Global Inconsistent Accuracy | Local Consistent Accuracy | Local Inconsistent Accuracy |
| Full-Scale IQ | ASD | .040 | .238 | .119 | .027 |
| TD | .204 | -.134 | .010 | .102 |
| Performance IQ | ASD | -.135 | -.025 | -.183 | -.033 |
| TD | .203 | -.058 | .054 | .131 |
| Verbal IQ | ASD | -.149 | .201 | -.065 | -.087 |
| TD | .121 | -.205 | -.117 | .108 |

*Note. *p* <.05*, **p* <.001

| Supplementary Table 2  *Pearson Bivariate Correlations Between Mean Reaction Time and Accuracy for ASD and TD Groups* | | | | | |
| --- | --- | --- | --- | --- | --- |
|  | Group | Global Consistent Accuracy | Global Inconsistent Accuracy | Local Consistent Accuracy | Local Inconsistent Accuracy |
| Global Consistent RT | ASD | -.232 | - | - | - |
| TD | -.310 | - | - | - |
|  |  |  |  |  |  |
| Global Inconsistent RT | ASD | - | -.214 | - | - |
| TD | - | .134 | - | - |
|  |  |  |  |  |  |
| Local Consistent RT | ASD | - | - | -.348* | - |
| TD | - | - | -.328* | - |
|  |  | - | - |  |  |
| Local Inconsistent RT | ASD | - | - | - | -.063 |
| TD | - | - | - | .035 |

*Note. *p* <.05*, **p* <.001


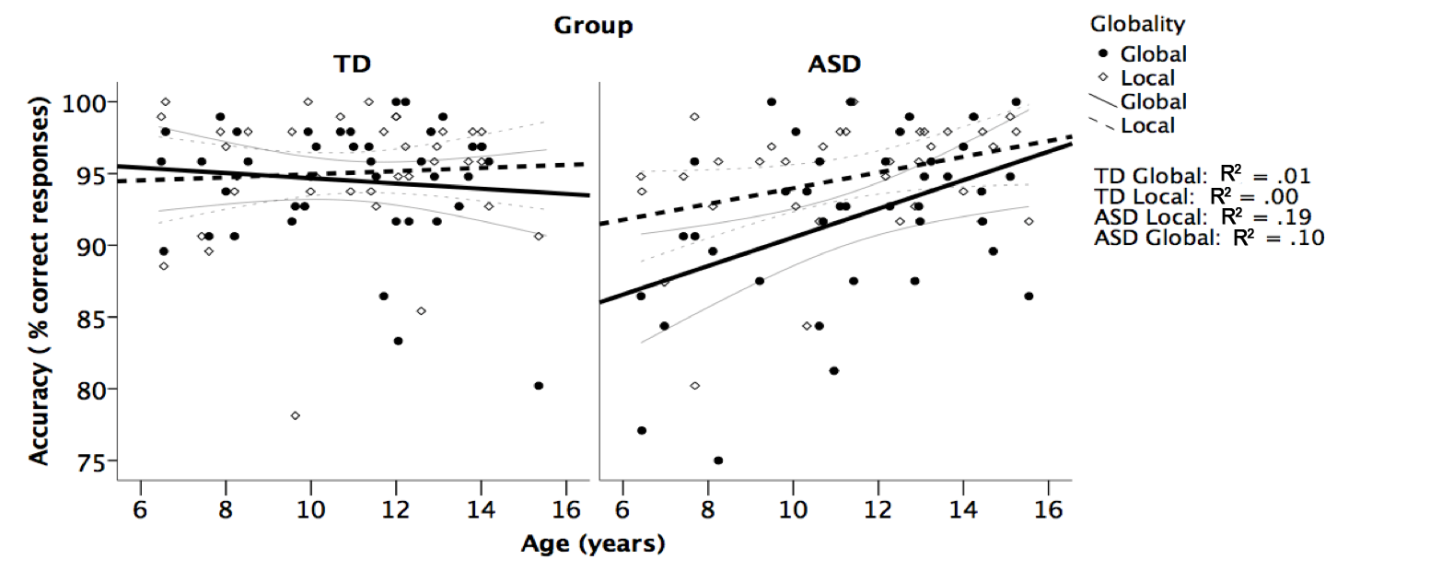


*Supplementary Figure 1.* Developmental trajectories of mean accuracy (% correct responses) for Global and Local conditions in Typically-Developing (TD) and Autism Spectrum Disorder (ASD) groups. R2 reflects the proportion of variance explained by each trajectory. Bold lines show regression lines. Thin lines show -/+ 95% confidence intervals.


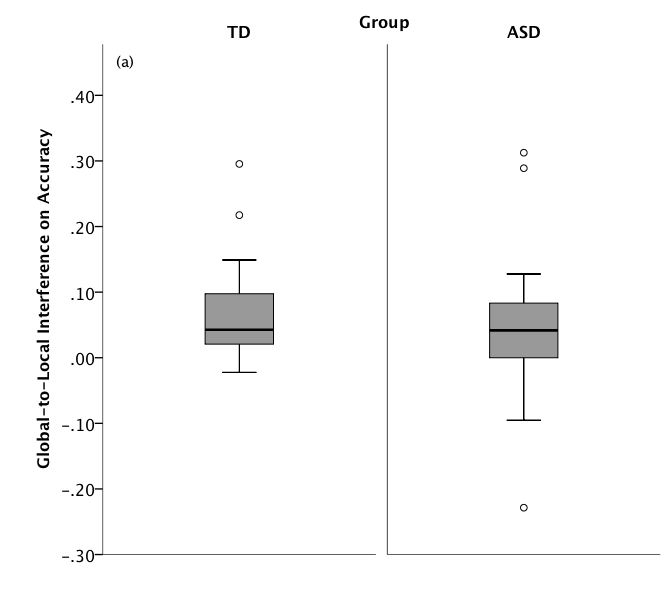


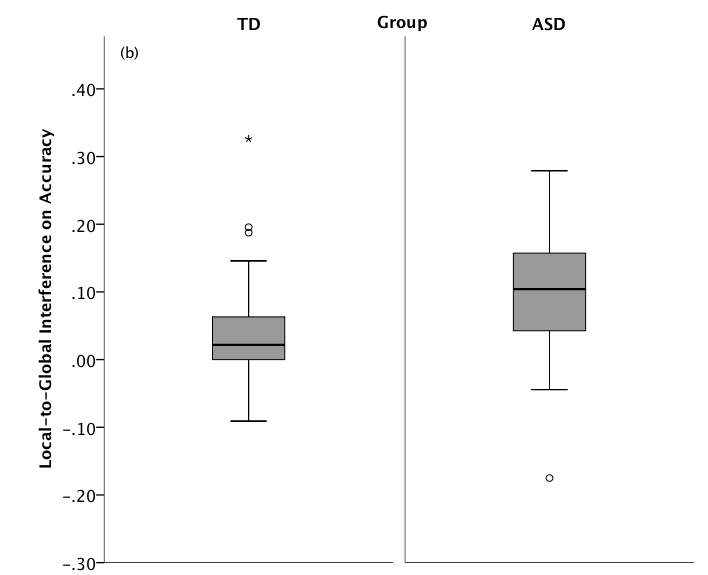


*Supplementary Figures 2a and b.* The effect of global-to-local (a) and local-to-global (b) interference on accuracy in TD and ASD groups.
